# Descriptions of new sponge species and genus, including aspiculate Plakinidae, overturn the Homoscleromorpha classification

CÉSAR RUIZ<sup>1</sup>, GUILHERME MURICY<sup>2</sup>, ANAÍRA LAGE<sup>2</sup>, CELSO DOMINGOS<sup>2</sup>,  
SANDRINE CHENESSEAU<sup>1</sup> and THIERRY PÉREZ<sup>1\*</sup>

<sup>1</sup>*Institut Méditerranéen de Biodiversité et d'Écologie Marine et Continentale (IMBE), UMR CNRS 7263, IRD 237 – Aix Marseille Université - Avignon Université, Station Marine d'Endoume, Rue de la Batterie des Lions, 13007 Marseille, France*

<sup>2</sup>*Departamento de Invertebrados, Museu Nacional, Universidade Federal do Rio de Janeiro, Quinta da Boa Vista, s/no, São Cristóvão, 20940-040 Rio de Janeiro, RJ, Brazil*

Received 16 February 2016; revised 22 May 2016; accepted for publication 5 July 2016

Among the Porifera, the taxonomy and systematics of Homoscleromorpha is one of the most challenging. Over the last two decades, this class and its single order Homosclerophorida have seen a high rate of new descriptions and phylogenetic investigations which have led to the resurrection of two well-supported families, defined as the 'spiculate' Plakinidae and the 'aspiculate' Oscarellidae. In recent years, the development of an integrative taxonomic approach and the exploration of new marine ecosystems have revealed an even higher diversity of Homoscleromorpha and highlighted the importance of complementary datasets (cytological, biochemical and molecular) to better explain the phylogenetic classification. Using this integrative approach, we here describe two new species of Plakinidae from submarine caves in the Caribbean Sea: *Plakina arletensis* sp. nov. and *Aspiculophora madinina* gen. nov. sp. nov., the latter being aspiculate with an unusually well-developed collagen layer in its mesohyl and an abundant and diverse prokaryote community. The recently described *Oscarella nathaliae* was reassigned to *Plakina* on the basis of new molecular data and a careful re-examination of morphological characters. Thus, *Plakina nathaliae* comb. nov. and *A. madinina* are the first aspiculate representatives of Plakinidae and indicate the need for a detailed re-examination of Homoscleromorpha using this integrative taxonomic approach.

© 2017 The Linnean Society of London, *Zoological Journal of the Linnean Society*, 2017  
doi: 10.1111/zoj.12480

ADDITIONAL KEYWORDS: Homoscleromorpha – integrative taxonomy – phylogeny – Porifera – submarine caves – systematics.

## INTRODUCTION

Sponges often dominate in terms of both diversity and biomass in semi-dark and dark rocky marine habitats (Hart, Manning & Iliffe, 1985; Vacelet, 1999). In the last four decades, studies of submarine caves have revealed many new species which often exhibit original biological (adaptive) traits (Hart *et al.*, 1985; Vacelet, Boury-Esnault & Harmelin, 1994; Vacelet, 1999). These studies were mainly

conducted in the Mediterranean Sea and focused on habitat, community and species descriptions (Pouliquen, 1972; Harmelin, Vacelet & Vasseur, 1985; Fichez, 1990; Harmelin, 2003; Pérez *et al.*, 2004; Gerovasileiou *et al.*, 2015). Among submarine cave-dwellers, homoscleromorph sponges represent an abundant and diverse taxonomic group; 82% of the Mediterranean homoscleromorph species can be found in submarine caves, and 41% of them are cave-exclusive (Ereskovsky, Ivanišević & Pérez, 2009; Gerovasileiou & Voultsiadou, 2012). It is likely that surveys of as yet unexplored submarine caves throughout the oceans will lead to the discovery of

\*Corresponding author. E-mail: thierry.perez@imbe.fr

new representatives of this poorly known group of sponges.

Homoscleromorpha was recently elevated to the rank of class (Gazave *et al.*, 2012), and is currently represented by one order, Homosclerophorida Dendy, 1905, and two families, Plakinidae Schulze, 1880 and Oscarellidae Lendenfeld, 1887. Plakinidae comprises the following six genera: *Corticium* Schmidt, 1862; *Plakina* Schulze, 1880; *Plakortis* Schulze, 1880; *Plakinastrella* Schulze, 1880; *Placinolopha* Topsent, 1897; *Tetralophophora* Rützler *et al.*, 2014. Plakinidae is currently defined as ‘Homosclerophorida with siliceous skeletal components represented by calthrops, diods and triods’ (Gazave *et al.*, 2010: 11). This family is also characterized by a sylleibid-like or leuconoid aquiferous system harbouring eurypylous or aphodal choanocyte chambers (Gazave *et al.*, 2010). Oscarellidae is defined as ‘Homosclerophorida without spicules, with a sylleibid-like or leuconoid aquiferous system made up of spherical, eurypylous or diploidal choanocyte chambers’ (Gazave *et al.*, 2010: 11). Within Oscarellidae, only two genera are recognized as valid in the World Porifera Database (Van Soest *et al.*, 2016): *Oscarella* Vosmaer, 1884 and *Pseudocorticium* Boury-Esnault, Muricy, Gallisian & Vacelet, 1995.

The lack of diagnostic morphological characters combined with phenotypic plasticity has resulted in much debate regarding the systematics of Homoscleromorpha, and its challenging taxonomy has led to several erroneous identifications, cases of alleged cosmopolitanism and unresolved species-complexes (Boury-Esnault *et al.*, 2013). Clearly there was a need for the exploration of other characters and datasets which may have the potential to shed light on the taxonomy and systematics of this group. Allozymes were first used to distinguish sibling species in *Oscarella* and *Corticium* (Boury-Esnault, Solé-Cava & Thorpe, 1992; Solé-Cava *et al.*, 1992). Cytological investigations also provided complementary characters for species delimitation among Oscarellidae (Boury-Esnault *et al.*, 1992; Muricy *et al.*, 1996; Muricy, 1999) and to a lesser extent in the genus *Plakina* (Muricy *et al.*, 1999). More recently, metabolomics was presented as a promising method to be included in an integrative approach to solve the new challenges in sponge systematics (Cárdenas, Pérez & Boury-Esnault, 2012). This integrative approach led to new insights into Homoscleromorpha interspecific relationships (Ivanišević *et al.*, 2011; Boury-Esnault *et al.*, 2013; Ruiz *et al.*, 2015) but maintained the distinction between the aspiculate family Oscarellidae and the spiculate Plakinidae.

In this paper, we use morphological, cytological and molecular datasets to describe one new genus and two new species of Plakinidae from submarine

caves in the Caribbean Sea (Lesser Antilles, eastern Caribbean). We also present original molecular data which indicate that *Oscarella nathaliae* Ereskovsky, Lavrov & Willenz, 2013 should be reassigned to the genus *Plakina*, and consequently to the family Plakinidae. Together, these new data demonstrate that the present definitions of the two Homosclerophorida families are too simplistic and must be revised, especially because our new species descriptions provide new evidence that characters (synapomorphies) can be lost during evolution. Although this is not new for the Porifera, it was a matter of debate for Homoscleromorpha.

## MATERIAL AND METHODS

### SAMPLING

Specimens were collected by SCUBA diving in June 2011, March 2012, December 2013 and March 2014 from various sites around La Martinique Island, in December 2014 from the Caribbean coast of Colombia and then during the PACOTILLES cruise across the Lesser Antilles in May and June 2015 (Fig. 1). The specimens were all found on vertical walls, under horizontal rocks or on the ceiling of submarine caves at 7–25 m depth. Underwater photos and general information (size, shape, colour and consistency) were registered for each individual. Each sample was fixed in 95% ethanol and in 2.5% glutaraldehyde for molecular and morphological analyses, respectively.

### SKELETAL ANALYSIS

A piece of sponge was embedded in Araldite, at least three sections of about 5 mm thick were cut with a low-speed saw and wet-ground with abrasive paper or polishing discs to obtain thinner sections (< 1 mm thick), which were then mounted on glass slides and observed under a light microscope. For spicule preparations, a small fragment of each specimen was boiled with 5 mL nitric acid for organic degradation, and then washed several times with distilled water. The resulting solution was placed on slides for light microscopy. A minimum of 20 measurements were carried out for each spicule type. Spicule measurements are expressed as minimal and maximal length in micrometres. For scanning electron microscopy (SEM), slides containing spicules were coated with gold-palladium and observed under a Hitachi S-570 microscope.

### CYTOLOGY

A small fragment of each specimen was fixed in 2.5% glutaraldehyde in 2 M phosphate buffer and filtered

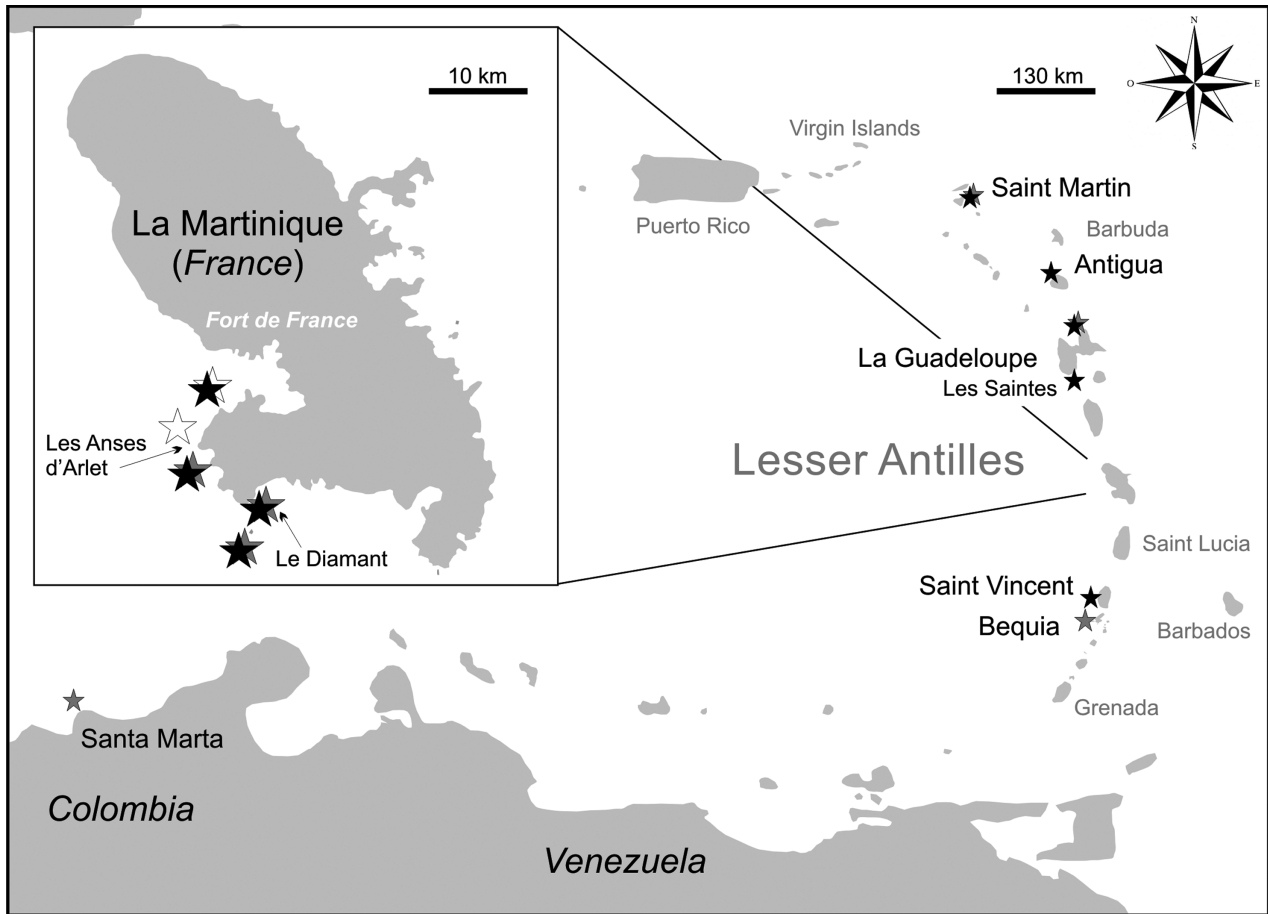

**Figure 1.** Known distribution in the Caribbean Sea of *Plakina arletensis* sp. nov. (white stars), *Plakina nathaliae* comb. nov. (grey stars) and *Aspiculophora madinina* gen. nov., sp. nov. (black stars).

seawater (1:4:5, by vol.), then post-fixed in 2% OsO<sub>4</sub> in seawater (Boury-Esnault, De Vos & Vacelet, 1984). Siliceous spicules were dissolved with 5% hydrofluoric acid for 2 h. For semi-thin and ultra-thin sections, each fragment was embedded in Araldite. Semi-thin sections were stained with toluidine blue and observed under a Leica DMBL light microscope. Ultra-thin sections were made using an RMC ultramicrotome PTXL. The cuts were placed on a copper grid (3.05 mm in diameter, 300 meshes) and stained with 2% uranyl acetate for 15 min. Observations were carried out with a JEOL JEM-1400 (Peabody, MA, USA) transmission electron microscope. The cytological and prokaryotic composition of each sample was analysed, taking into account the cells' morphology, dimensions and cytoplasm characteristics.

#### DNA ANALYSIS

For our molecular systematics study, we chose cytochrome oxidase 1 (CO1) markers because of their

known value in differentiating closely related species among Homoscleromorpha (see, for instance, Pérez *et al.*, 2011; Boury-Esnault *et al.*, 2013; Ruiz *et al.*, 2015). DNA extractions were performed from small sponge fragments (2 cm<sup>3</sup>) using a QIAamp DNA Mini Kit (Qiagen, Courtaboeuf, France). Two sets of primers were used: the universal primers LCO1490 and HCO2198 to amplify a 584-bp portion of the CO1 mitochondrial gene (Folmer *et al.*, 1994), and C1-Npor2760 and C1-J2165 to amplify a 507-bp fragment (I3-M11) of the CO1 mitochondrial gene (Misof, Erpenbeck & Sauer, 2000; Erpenbeck *et al.*, 2002). Amplifications were done in a 40 µL total reaction volume with: 4 µL of each primer (10 µM), 6.4 µL dNTPs (10 mM), 8 µL polymerase buffer, 5 µL MgCl<sub>2</sub> (25 mM), 0.2 µL *Taq* polymerase (5 U µL<sup>-1</sup>), 2.4 µL extracted DNA and 10 µL of ultrapure (Milli-Q) water. PCRs were performed on a Mastercycler gradient PCR-S Eppendorf thermocycler with an initial step of 5 min at 94 °C followed by 40 amplification cycles (denaturation at 94 °C for 1 min; annealing at 42 °C for 1 min; and extension at 72 °C for 1 min),

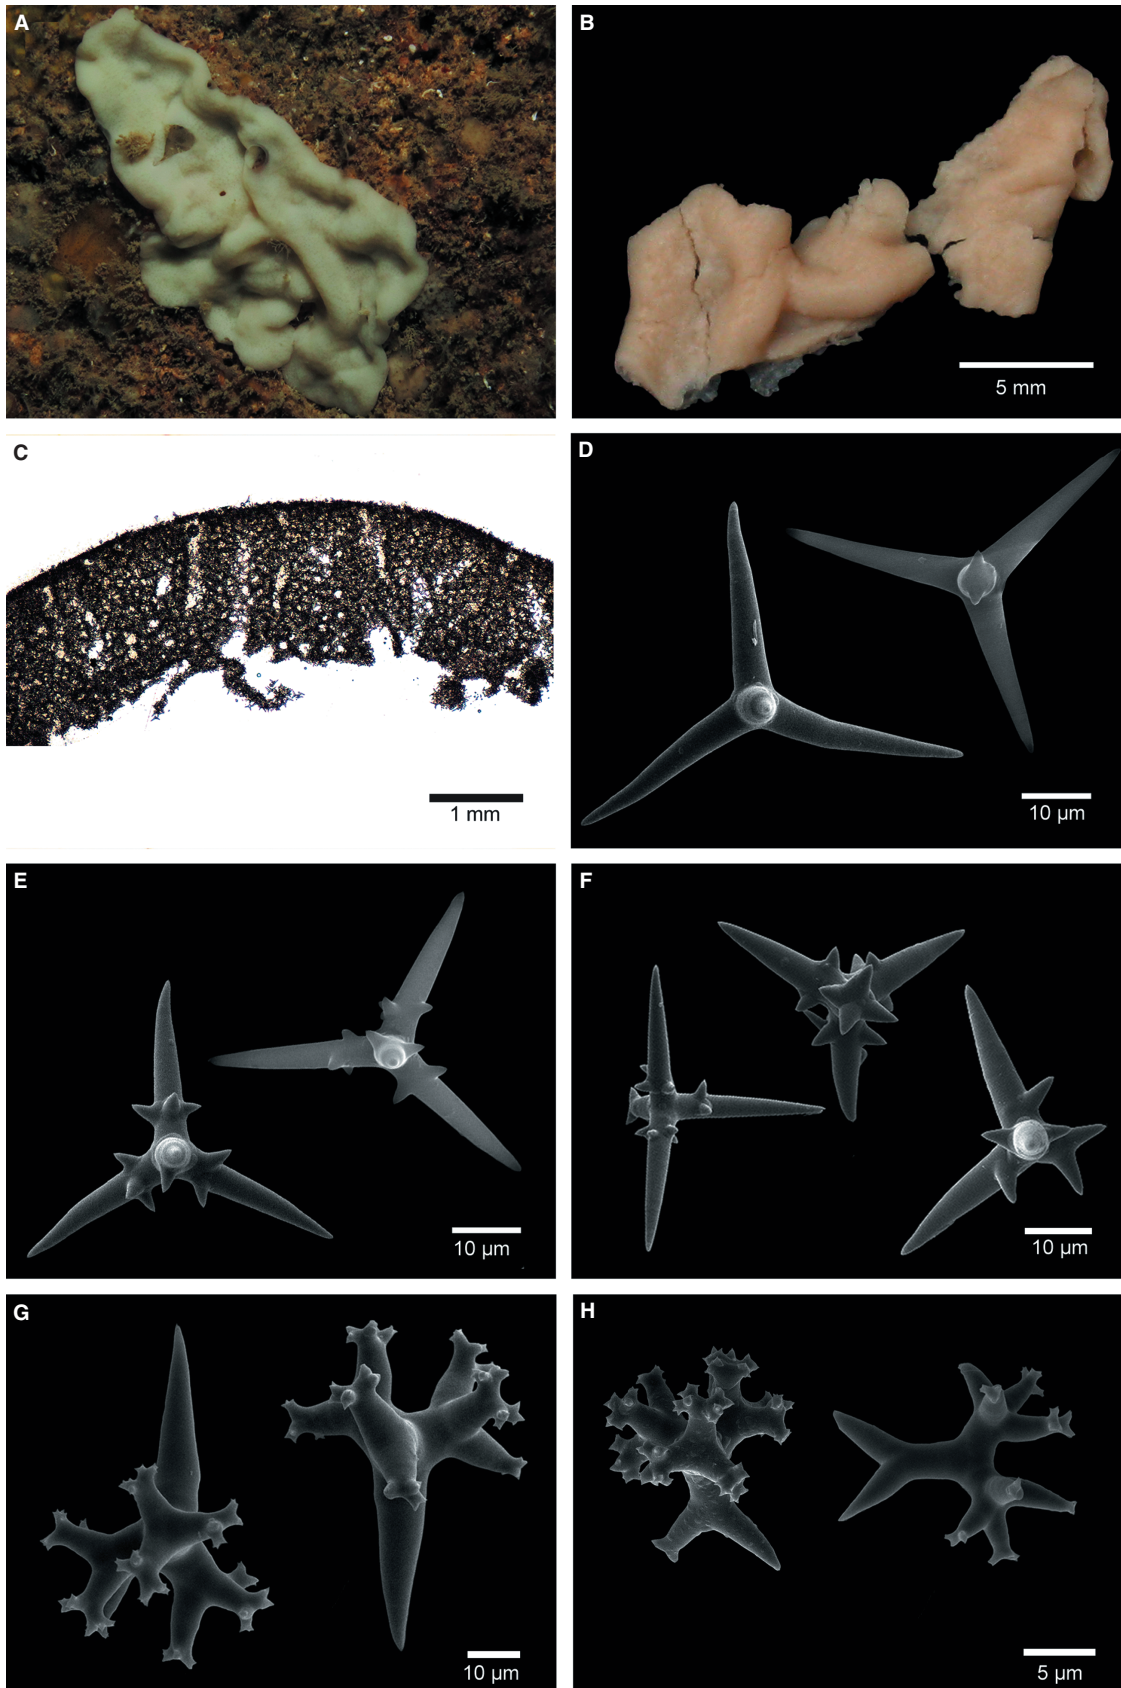

and a final extension step at 72 °C for 5 min. PCR products were directly sequenced in each primer direction by Eurofins laboratory. For the phylogenetic tree using the Folmer fragment, 14 sequences were downloaded from GenBank and compared with five sequences obtained during this study. For the I3-M11 fragment, we used 14 sequences downloaded from GenBank with eight new sequences from the present study. A concatenated tree was also constructed using all new and downloaded sequences obtained from both fragments (total of 1078 bp). At least one species of each homoscleromorph genus was included in the analysis with the exception of *Placinolopha*.

Sequences were aligned using BIOEDIT 7.0.5.3 (Hall, 1999). Phylogenetic trees were constructed using both the neighbour-joining (NJ) method (1000 bootstrap replicates) with CLUSTAL X 2.0 (Larkin *et al.*, 2007) and maximum-likelihood (ML) method, under the GTR + I + G model (previously tested using Jmodeltest software; Darriba *et al.*, 2012) with a non-parametric bootstrap resampling of 100 replicates using PhyML algorithms (Guindon *et al.*, 2010). The concatenated tree was made with RAxML (Stamatakis, 2014) on XSEDE with the online platform CIPRES (<http://www.phylo.org>). In all analyses, the Demospongiae *Xestospongia muta* (Schmidt, 1870) was used as the out-group.

## RESULTS

### SYSTEMATICS

PHYLUM PORIFERA GRANT, 1836

CLASS HOMOSCLEROMORPHA BERGQUIST, 1978

ORDER HOMOSCLEROPHORIDA DENDY, 1905

FAMILY PLAKINIDAE SCHULZE, 1880

*Definition:* Homosclerophorida with siliceous spicules represented by diods, triods and/or calthrope. Aquiferous system syllebid-like or leuconoid, made up by eurypylous or aphodal choanocyte chambers.

GENUS *PLAKINA* SCHULZE, 1880

#### *Type species*

*Plakina monolopha* Schulze, 1880

#### *Definition*

Plakinidae with spicules diods, triods and calthrope in a single size class, and with homolopose

calthrope with one to four lopate rays (Muricy & Díaz, 2002).

### ***PLAKINA ARLETENSIS* SP. NOV.**

#### **FIGS 2, 3**

#### *Material examined*

*Holotype:* MNHN DJV177, Grotte Chauve-Souris at 12 m depth, Anse Noire, La Martinique (14°32.024'N, 61°05.278'W). Collector: T. Pérez, 10 December 2013. Slides and a fragment of the holotype were deposited in the sponge collection of the Museu Nacional of Universidade Federal do Rio de Janeiro, Brazil (MNRJ 18460).

*Paratype:* MNHN DJV178, Grotte Chauve-Souris at 11 m depth, Anse Noire, La Martinique. Collector: T. Pérez, 6 March 2014.

#### *Other specimens examined*

150530-GU6-TP04, Grotte Amédien at 12 m depth, La Guadeloupe (16°30.033'N, 061°28.774'W). Collector: T. Pérez, 30 May 2015.

150516-MT8-CR03, Anse Fortune at 7 m depth, La Martinique (14°30.377'N, 61°05.850'W). Collector: C. Ruiz, 16 May 2015.

#### *Comparative material examined*

*Plakina jamaicensis* Lenhert & van Soest, 1998. RBINS POR 70, Chalet Caribe caves, West of Montego Bay, Jamaica (18°27.246'N, 77°58.287'W). Collector P. Willenz and A. Ereskovsky.

*Etymology:* *Plakina arletensis* refers to the little village 'Les Anses d'Arlet', close to the cave where this sponge was first found, which is one of the most beautiful places in La Martinique. This is also a special dedication to the kind and warm inhabitants of this village.

*Diagnosis:* Thin encrusting and white *Plakina*, with a rugose folded surface, a skeleton made of monolopose, trilopose and tetralopose calthrope, actines with and without terminal spines. Diods and triods are absent. Well-developed mesohyl with a high abundance of prokaryotic symbionts.

#### *Description*

Small crust, about 2–15 cm in size, 0.2–0.5 cm thick. White colour *in vivo*, becoming slightly cream or light brown in alcohol (Fig. 2A, B). The consistency

**Figure 2.** *Plakina arletensis* sp. nov. A, *in situ* photo. B, same specimen after fixation in alcohol. C, transversal cut of skeleton. D, calthrope without spines. E, calthrope with spines. F, monolopose calthrope. G, trilopose calthrope. H, tetralopose calthrope.

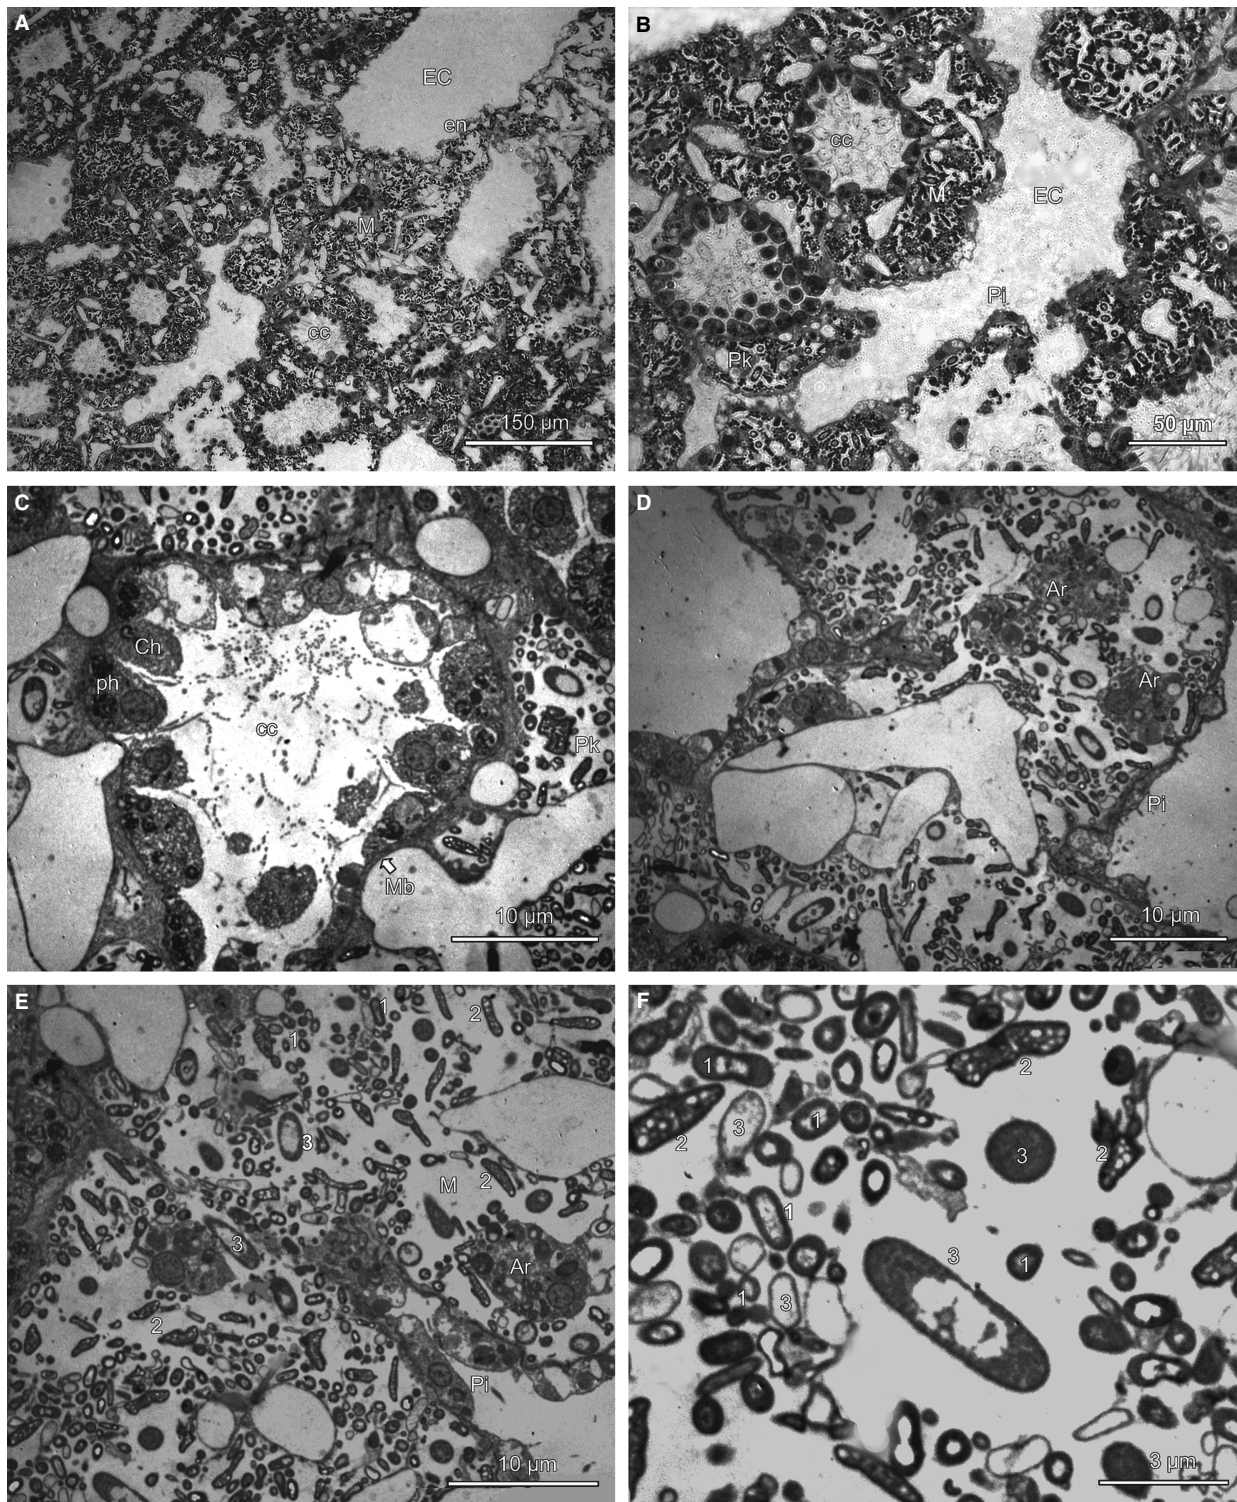

**Figure 3.** A, general soft tissue organization of *Plakina arletensis* sp. nov. B, detailed view of the mesohyl, showing the aquiferous system. C, transmission electron micrograph of a choanocyte chamber. D transmission electron micrograph with archeocytes and pinacocytes. E, transmission electron micrograph showing the abundance of prokaryotic cells inside the mesohyl and the three main morphotypes (1–3). F, transmission electron micrograph with a detailed view of the prokaryote symbionts (1–3). Ar, archeocytes; cc, choanocyte chamber; Ch, choanocyte; en, endosome; EC, exhalant canal; Mb, basement membrane; M, mesohyl; ph, phagosome; Pi, pinacocytes; Pk, prokaryotes.

is cartilaginous and the surface is rugose and irregularly folded. Oscules are circular, 1–2 mm in diameter, with a slightly elevated rim.

**Skeleton:** The skeleton is dense, especially at the surface which is pierced principally by trilophose calthrops. The choanosomal skeleton has an alveolar arrangement formed by all spicule types (Fig. 2C).

**Spicules:** Diods and triods are absent. Calthrops are irregular, abundant, their actines (20–30 µm long) being with or without spines. Spines (1–4) are short and conical, usually at the basis of each actine (Fig. 2D, E). Monolophose calthrops are abundant (13–28 µm actines long). The lophose actine is distally ramified by 2–4 short conical rays with sharp endings (Fig. 2F). Trilophose calthrops are common; lophose actines ramify close the base in 2–3 rays, distally in 2–4 smaller rays with terminal spines (ramification pattern 1 proximal, 2 distal, terminal spines; for the terminology of ramification patterns, see Muricy & Díaz, 2002). The non-lophose actines are 10–30 µm long (Fig. 2G). Tetralophose calthrops are heterolophose and the less abundant spicule type. The three apical actines ramify distally in 3–4 rays, then distally in 2–5 short rays with terminal spines. The basal actine ramifies distally in two rays, and then distally again in 2–3 short rays with terminal spines (ramification pattern 1 distal, 2 distal, terminal spines). The actine length is 5 µm on average (Fig. 2H; Table 1).

**Tissue general organization:** The ectosome is 15–30 µm thick, separated from the choanosome by subectosomal cavities (15–40 µm) with a well-developed system of inhalant/exhalant canals (25–140 µm wide). The aquiferous system is leuconoid (Fig. 3A, B). Choanocyte chambers, 47–78 µm in diameter, are spherical and diploidal (Fig. 3B, C).

**Cytology:** Choanocytes are 3–7 µm wide and 4–6 µm high, their collar, 40–50 µm in diameter, is composed

of about 50 microvilli. The choanocyte nucleus is spherical and located on the apical area of the cell (4–5 µm in diameter). Their cytoplasm is dense, often with one to five phagosomes of about 1.0–1.5 µm (Fig. 3B, C). The exo- and endopinacocytes are flat or ovoid (15–27 µm long and 7–11 µm large), with several vacuoles observed in their cytoplasm (Fig. 3B–D). Their nucleus is also flattened (4–5 µm in diameter). Choanocytes and pinacocytes are flagellated, underlined by a basement membrane (Fig. 3C, D). Few archaeocytes were observed. They have an irregular form with a spherical nucleus 2 µm in diameter (Fig. 3D, E).

**Symbiotic prokaryotes:** *Plakina arletensis* sp. nov. can be considered as a high microbial abundance (HMA) sponge. Three main morphotypes were easily detected, all three being extracellular and randomly dispersed in most of the mesohyl (Fig. 3E, F). The first morphotype corresponds to an abundant ovoid cell (1.5–1.8 µm long; 0.4–1 µm high), with a more or less dense periplasm. We consider most of the small spherical forms as a perpendicular view of morphotype 1 (Fig. 3E, F). The second morphotype, less abundant, has a rod-like to irregular shape (2–3 × 0.3–0.8 µm) with several translucent vacuoles. The third morphotype, less abundant, has the same ovoid form and dense periplasm as the first morphotype, but is bigger (3–5 × 1–1.7 µm) (Fig. 3E, F).

**Ecology:** *Plakina arletensis* sp. nov. is found only in shallow water caves, where it forms a white crust with a patchy distribution on vertical walls. No indications of epibiosis or predation were observed.

#### Taxonomic remarks

*Plakina arletensis* sp. nov. has a growth-form typical of the 'true' *Plakina* species. It has mono-, tri- and tetra-lophose calthrops like the Mediterranean species *P. trilopha* Schulze, 1880, *P. jani* Muricy, Boury-Esnault, Bézac & Vacelet, 1998, *P. endoumensis*

**Table 1.** Comparison of spicule size and abundance between *Plakina* species from the Caribbean, the Mediterranean Sea and the north-east of Brazil

| Spicule characters (size in µm)           | <i>P. trilopha</i> | <i>P. jani</i> | <i>P. jamaicensis</i> | <i>P. coerulea</i> | <i>P. arletensis</i> |
|-------------------------------------------|--------------------|----------------|-----------------------|--------------------|----------------------|
| Diods (length)                            | A, 40–88           | A, 43–100      | A, 61–91              | 63–90              | –                    |
| Triods (actine length)                    | A, 12–33           | A, 16–37       | A, 22–36              | 60–75              | –                    |
| Calthrops (actine length)                 | C, 10–35           | C, 16–38       | A, 6–33               | 41–55              | A, 20–30             |
| Monolophose calthrops (actine length)     | R, 20–30           | R, 22–38       | R, 20–32              | 25–36              | A, 13–28             |
| Dilophose calthrops (actine length)       | R, 20–35           | R, 30–35       | R, 25–36              | 28–35              | –                    |
| Trilophose calthrops (actine length)      | A, 16–27           | C, 19–32       | R, 22–29              | 15–21              | C, 10–25             |
| Tetralophose calthrops (actine length)    | C, 10–25           | C, 19–25       | C, 17–26              | 12–21              | R, 5–7               |
| Ramification pattern of lophose calthrops | 1 md, ts           | 1 m, 2d, ts    | 1 m, 2d, ts           | 1m, 2d, ts         | 1d, 2d, ts           |

A, abundant; C, common; R, rare (see Muricy *et al.*, 1998 for a description of the ramification patterns).

Muricy, Boury-Esnault, Bézac & Vacelet, 1998 and *P. weinbergi* Muricy, Boury-Esnault, Bézac & Vacelet, 1998 or like *P. jamaicensis* from the Caribbean Sea or *P. coerulea* Cedro, Hajdu & Correia, 2013 from north-eastern Brazil. In contrast to these two sponges, the new species does not possess diods or triods (Table 1). The tetralophose calthrops are heterolophose, but not candelabra-like as in *Corticium*. The basal actin is best described as bifurcated, with different ramification patterns in comparison with the apical actines. This type of heterolophose calthrops can be observed in other *Plakina* species such as *P. jani* and *P. endoumensis* (Muricy *et al.*, 1998).

*Plakina arletensis* sp. nov. has a well-developed mesohyl, with subectosomal cavities similar to *P. trilopha*, *P. jani* and *P. kanaky* Ruiz & Pérez, 2015 (Table 2). As with most *Plakina* species, the new species does not have vacuolar cells in the mesohyl, but prokaryote symbionts are abundant (Muricy *et al.*, 1999). In addition to the similarities in morphological traits, the assignment of the new species to *Plakina* is also highly supported by phylogenetic analyses. The CO1 sequences for our new species show it clustering with other *Plakina* species and also show it to be a distinct species (see below).

***PLAKINA NATHALIAE* (ERESKOVSKY, WILLENZ & LAVROV, 2013) COMB. NOV.**

FIG. 4

*Synonymy*

*Oscarella nathaliae* Ereskovsky, Willenz & Lavrov, 2013

*Holotype*: RBINS POR 90, 22 m depth. Le Diamant, Grotte du Fer à Cheval, La Martinique (14°28.067'N, 61°00.983'W). Collector: P. Willenz and A. Ereskovsky. 7 June 2003.

*Paratype*: MNHN DJV179, 17 m depth. Rocher du Diamant, Grotte de Zeb, La Martinique (14°26.5'N, 61°03.083'W). Collector: T. Pérez. 13 June 2011.

*Other material examined*

250312-MT4b-TP2. Grotte du Fer à Cheval at 20 m depth, le Diamant, La Martinique (14°28.067'N, 61°00.983'W). Collector: T. Pérez. 25 March 2012.

131203-MT3-AE4. Grotte Couleur, Pointe Burgos at 12 m depth, Anse d'Arlet, La Martinique (14°29.752'N, 61°05.407'W). Collector: A. Ereskovsky. 3 December 2013.

150529-GU3-CR6. Grotte Cathédrale at 15 m depth, Anse Bertrand, La Guadeloupe (16°27.740'N, 061°31.837'W). Collector: C. Ruiz. 29 May 2015.

GR34HOM30. Grotte Cathédrale at 15 m depth, Anse Bertrand, La Guadeloupe (16°27.740'N, 061°31.837'W). Collector: A. Ereskovsky. 18 May 2012.

150527-SN5-TP1. Basses Espagnoles at 12 m depth, Saint Martin (18°07.821'N, 63°00.270'W). Collector: T. Pérez. 27 May 2015.

141211-SM5-CR3. Punta Gaira at 17 m depth, El Rodadero, Santa Marta, Colombia (11°13.133'N, 74°14.45'W). Collector: C. Ruiz. 12 December 2014.

141212-SM7-CR2. Punta Venado at 20 m depth, Taganga, Santa Marta, Colombia (11°16.217'N, 74°12.367'W). Collector: C. Ruiz. 12 December 2014.

*Diagnosis* (modified from Ereskovsky *et al.*, 2013): Cave-dwelling thin and translucent aspiculate Plakinidae. Colour milky beige, sometimes pale orange, forming pendulous thin layers with a perforated surface and a clearer membrane in the periphery. Consistency soft, slimy and very fragile. Two mesohylar cells with inclusions: large, abundant vacuolar cells and small, rare granular cells.

*Distribution* (modified from Ereskovsky *et al.*, 2013): Caribbean: Greater Antilles, Jamaica, and Lesser Antilles, Saint Martin, La Guadeloupe, La Martinique, Les Grenadines (Bequia); south-western Caribbean: Colombia (Santa Marta). This species is always found in semi-dark caves, from 10 to 50 m depth.

*Taxonomic remarks*

Eight specimens of *P. nathaliae* were identified by comparing morphological, cytological and/or genetic characters. All individuals share the features of the species described by Ereskovsky *et al.* (2013): cave-dwelling species, thin layer yellow to beige in colour (Fig. 4A–D), thin ectosome (3–50 µm high) with syllebeid aquiferous system and spherical choanocyte chambers (Fig. 4E). The two mesohyl cells originally described were also found in the studied specimens.

***ASPICULOPHORA* GEN. NOV.  
*ASPICULOPHORA MADININA* SP. NOV.**

FIGS 5, 6

*Diagnosis*: Plakinidae without spicules, well-developed mesohyl with a thick collagen layer and without subectosomal cavities. Generally brown, but also cream to white. Smooth and 'grooved' surface. Jelly-like consistency. Leuconoid aquiferous system and aphodal choanocyte chambers. High abundance of prokaryotic symbionts.

*Holotype*: MNHN DJV180, Rocher du Diamant at 12 m depth, La Martinique (14°26.5'N, 61°03.083'W). Collector: T. Pérez, 13 June 2011.



**Table 2.** Comparison of principal cytological characters among *Plakina* species

| Character                                 | <i>Plakina trilopha jani</i> | <i>Plakina crypta</i> | <i>Plakina endoumensis</i> | <i>Plakina kanaky jamaicensis</i> | <i>Plakina arletensis</i> | <i>Plakina nathaliae</i> | <i>Aspiculophora madinina</i> |
|-------------------------------------------|------------------------------|-----------------------|----------------------------|-----------------------------------|---------------------------|--------------------------|-------------------------------|
| Well-developed mesohyl                    | +                            | -                     | -                          | +                                 | +                         | -                        | +                             |
| Sub-ectosomal cavities                    | +                            | -                     | -                          | +                                 | +                         | -                        | -                             |
| Collagen density                          | Moderate                     | Low                   | Low                        | Moderate                          | Moderate                  | Low                      | High                          |
| Aquiferous system                         | Leuconoid                    | Leuconoid             | Leuconoid                  | Leuconoid                         | Leuconoid                 | Leuconoid                | Leuconoid                     |
| Mesohyl/chambers ratio                    | 1.5:1                        | 0.7:1                 | 0.9:1                      | 1.8:1                             | 1.5:1                     | 0.7:1                    | 1.8:1                         |
| Choanocyte chambers                       | Eurypylous                   | Eurypylous            | Eurypylous                 | Eurypylous                        | Eurypylous                | Eurypylous               | Eurypylous                    |
| Choanocytes                               | Pyramidal                    | Pyramidal             | Cylindrical                | Ovoid–pyramidal                   | Ovoid–spherical           | Ovoid–spherical          | Ovoid–spherical               |
| Archaeocytes                              | +                            | +                     | +                          | +                                 | +                         | -                        | +                             |
| Vacuolar cells                            | +                            | -                     | -                          | -                                 | -                         | +                        | -                             |
| Number of prokaryote morphotypes          | >8                           | 6                     | 1                          | >8                                | 3                         | 2                        | 5                             |
| Morphotypes shared by two or more species | A, B, H, J                   | B                     |                            | 3, 6                              | 3, 1                      | B2                       | 1, 2                          |
| Bacterial distribution                    | Patchy                       | Random                | Random                     | Patchy                            | Patchy                    | Random                   | Patchy                        |
| Abundance of prokaryote symbionts         | HMA                          | LMA                   | LMA                        | HMA                               | HMA                       | LMA                      | HMA                           |

+, Presence; -, absence; HMA, high microbial abundance; LMA, low microbial abundance; NA, data not available (modified from Muricy *et al.*, 1999).

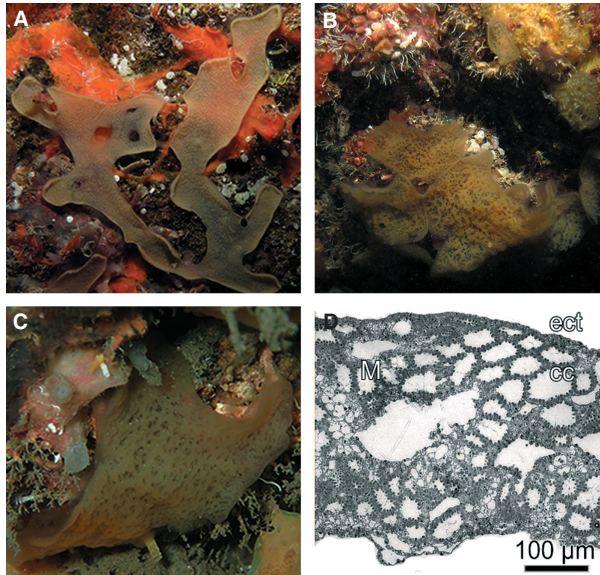

**Figure 4.** *Plakina nathaliae* comb. nov. A, *in situ* picture of a specimen from Rocher du Diamant, La Martinique. B, *in situ* picture of a specimen from Grotte Cathédrale, La Guadeloupe. C, *in situ* picture of a specimen from Punta Gaira, Colombia. D, light micrograph of a transversal section through the ectosome and the choanosome of *P. nathaliae*. cc, choanocyte chamber; ect, ectosome; M, mesohyl.

*Paratype 1:* MNHN DJV181, Tintamare, Les Arches at 10 m depth, Saint Martin (18°07.588'N, 62°58.248'W). Collector: C. Ruiz, 26 May 2015.

*Paratype 2:* MNHN DJV182, Grotte Cathédrale at 16 m depth, Anse Bertrand, La Guadeloupe (16°27.740'N, 061°31.837'W). Collector: C. Ruiz, 29 May 2015.

*Other specimens examined*

150514-MT6-TP1, Grotte Chauve-Souris at 7 m depth, Anse Noire, La Martinique (14°32.024'N, 61°05.278'W). Collector: T. Pérez, 14 May 2015.

150517-SV1-CR14, Bat Cave at 8 m depth, Bucament Bay, Saint Vincent (13°11.275'N, 61°16.174'W). Collector C. Ruiz, 17 May 2015.

150523-GU1-CR7, Cave north-west of Les Saintes at 8 m depth, Les Saintes, La Guadeloupe (15°52.984'N, 61°34.25'W). Collector: C. Ruiz & T. Pérez, 23 May 2015.

131206-MT3-AE2, Grotte Couleur, Pointe Burgos at 12 m depth, Anse d'Arlet, La Martinique (14°29.752'N, 61°05.407'W). Collector: A. Ereskovsky, 6 December 2013.

150527-SN3-TP5, Basses Espagnoles at 10 m depth, Saint Martin (18°07.821'N, 63°00.270'W). Collector: T. Pérez, 27 May 2015.

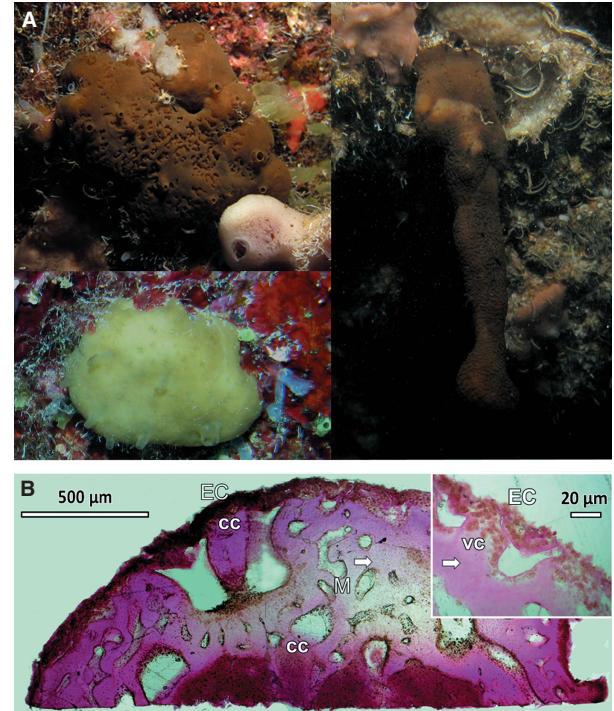

**Figure 5.** *Aspiculophora madinina* gen. nov. sp. nov. A, *in situ* pictures of three specimens collected in La Martinique. B, general histological organization, with a detailed view of the mesohyl and the collagen layer (arrow). cc, choanocyte chamber; EC exhalant canal; M, mesohyl; vc, vacuolar cells.

150528-AG3-CR1, Little Scrub at 15 m depth, Anguilla (18°17.903'N, 62°57.294'W). Collector C. Ruiz, 28 May 2015.

150530-GU6-TP7, Grotte Amédien at 12 m depth, La Guadeloupe (16°30.033'N, 061°28.774'W). Collector: T. Pérez, 30 May 2015.

*Etymology:* The genus name reflects the absence of skeleton: from Latin *a* (= without) *spiculum* (= spearhead, arrowhead) *phora* (= bearing). The species name, *madinina*, refers to the amerindian name, 'Flower Island', of La Martinique Island, which is the first island of the Caribbean Sea where this aspiculate Plakinidae was found.

*Description:* *Aspiculophora madinina* has mainly a cushion shape, measuring 2–15 cm in diameter by 2–5 cm high, but sometimes it can be found hanging down, with prominent oscules surrounded by a thin membranous collar (Fig. 5A). The colour *in vivo* is mainly brown, occasionally yellow to cream (Fig. 5A). Brown specimens produce a dark exudate in contact with alcohol. The consistency is soft, almost gelatinous. The surface is smooth and grooved. Oscules are circular, 1–2 mm in diameter with an elevated rim.

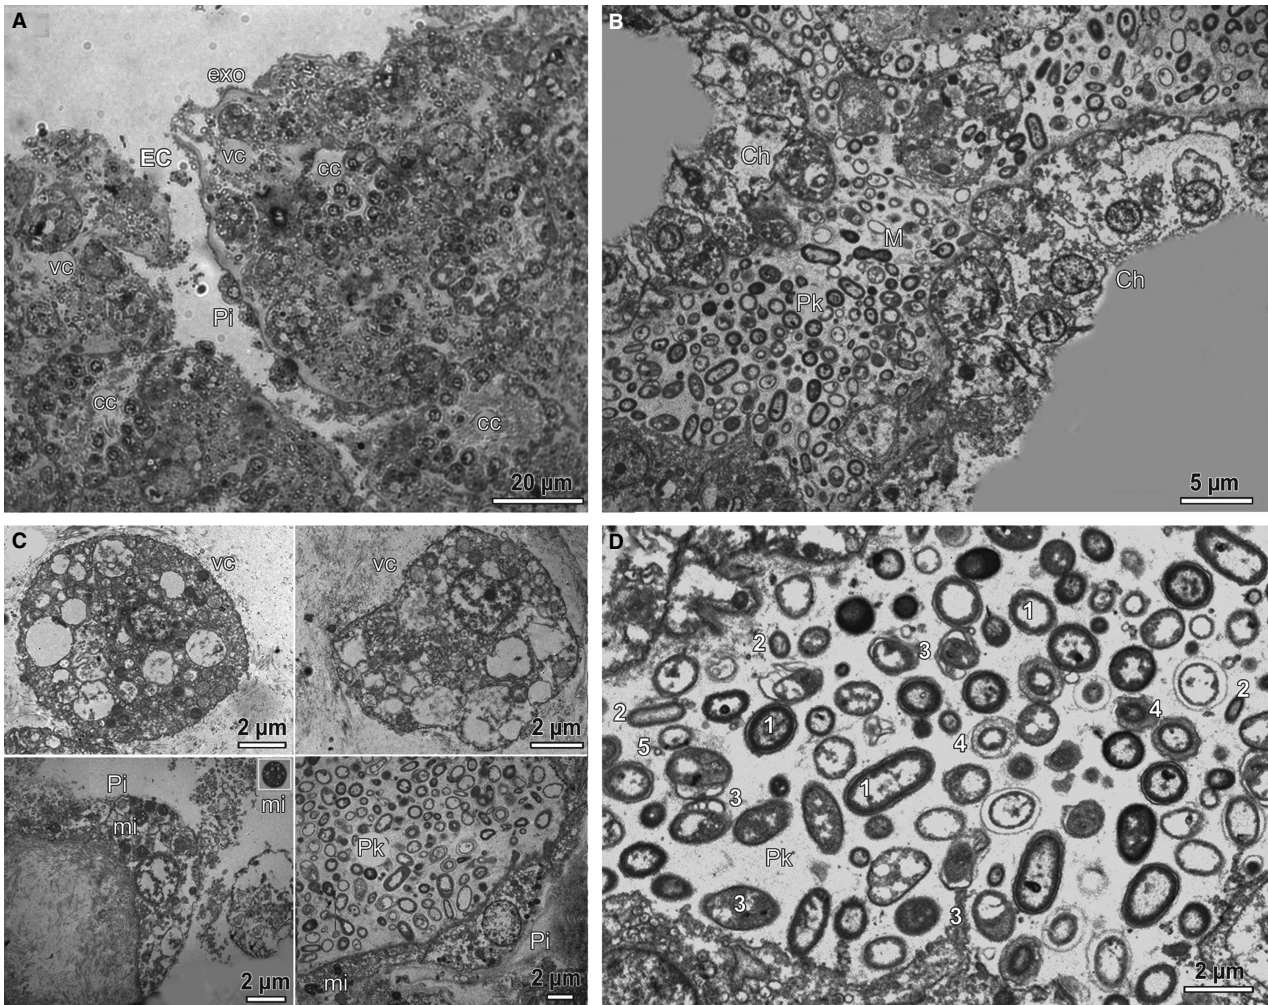

**Figure 6.** A, light micrograph of the ectosome and choanosome of *Aspiculophora madinina* gen. nov., sp. nov. B, transmission electron micrograph showing the high prokaryotic density in a part of the mesohyl located between two choanocyte chambers. C, transmission electron micrographs of vacuolar cells and pinacocytes. D, prokaryote morphotypes associated with the mesohyl of *Aspiculophora madinina*. Ch, choanocyte; cc, choanocyte chamber; EC, exhalant canal; exo, exopinacoderm; M, mesohyl; Pk, prokaryotes.

**Soft tissue organization:** The ectosome is 6–15 µm. The aquiferous system is leuconoid with inhalant/exhalant canals about 30–100 µm wide. A dense collagen fibril layer, about 8 µm in thickness, surrounds the exhalant canals. Some specimens also exhibit a thicker collagenous layer, about 1 mm, between the ectosome and the basal part of the sponge, where very few cells or prokaryotes are found (Fig. 5B). Choanocyte chambers (18–36 µm in diameter) are spherical and aphodal.

**Cytology:** The choanocytes are cylindrical to spherical, 4–7 µm wide and 6–7 µm high. Their nucleus, 2 µm in diameter, is spherical and in apical position (Fig. 6A, B). Their cytoplasm is not dense, often with one to three phagosomes and

microgranular inclusions of about 1.5 µm in diameter. These inclusions are also observed in endopinacocytes (Fig. 6C). The exo- and endopinacocytes are flattened, 15–20 µm long and 7–11 µm wide. Only one type of vacuolar cell is present and restricted to the ectosomal region, sometimes in aggregates, always close to exhalant canals (Fig. 6C). This spherical cell, 9–13 µm in diameter, has a nucleus of 3–4 µm and harbours between two and ten vacuoles. Few archaeocytes were observed, with an irregular form and a nucleus of about 2 µm in diameter.

**Symbiotic prokaryotes:** This sponge can be considered as an HMA sponge. Five morphotypes were distinguished based on their morphological traits. All prokaryotes are randomly dispersed and

**Table 3.** Accession numbers of the specimens sequenced in the present study using the Folmer (Folmer *et al.*, 1994) and the I3-M11 fragment (Misof *et al.*, 2000; Erpenbeck *et al.*, 2002) of the CO1 gene

|                               | Sample code     | CO1 fragment | Accession no. |
|-------------------------------|-----------------|--------------|---------------|
| <i>Plakina arletensis</i>     | 110613-MT6-TP1  | I3-M11       | KU674369.1    |
|                               | 140306-MT6-TP1  | I3-M11       | KU674370.1    |
|                               | 150516-MT8-CR3  | I3-M11       | KU674371.1    |
| <i>Plakina nathaliae</i>      | 110613-MT4-TP2  | Folmer       | KU674377.1    |
|                               | 141211 SM5-CR03 | Folmer       | KU674378.1    |
|                               | 141212 SM7-CR02 | Folmer       | KU674379.1    |
| <i>Aspiculophora madinina</i> | 110613-MT4-TP11 | I3-M11       | KU674367.1    |
|                               | 131206 MT3-AE2  | I3-M11       | KU674368.1    |
| <i>Corticium diamantense</i>  | 110613MT4-TP5   | Folmer       | KU674376.1    |
| <i>Plakinastrella onkodes</i> | 141209SM1CR01   | I3-M11       | KU674372.1    |
| <i>Plakinastrella</i> sp.     | GR26H7          | I3-M11       | KU674373.1    |
|                               | 150514-MT6-CR5  | I3-M11       | KU674374.1    |
|                               | 150515-MT4-CR15 | I3-M11       | KU674375.1    |
|                               | 130205NC10-01   | Folmer       | KU674380.1    |

occupy most of the mesohyl (Fig. 6B–D). The first morphotype corresponds to an abundant ovoid cell (2–3 µm long; 1–1.5 µm wide), with a clear membrane about 0.1 µm wide. The second morphotype, also abundant in the sponge mesohyl, has a rod form (1.5 µm long; 0.5 µm wide). The third morphotype has an irregular ovoid form (1.5–2.0 µm long; 1 µm wide), with a dense cytoplasm and one to three external vacuoles in contact with the cells' outer membrane. The fourth morphotype is a spherical cell, with a dense periplasm, of about 1 µm in diameter. The fifth morphotype is a small spherical cell of about 0.1 µm in diameter. This morphotype was sometimes observed in groups of three to five cells in a row (Fig. 6D).

*Ecology:* *Aspiculophora madinina* sp. nov. is a sciaphilous species, living on vertical walls of semi-dark and dark caves or under overhangs. It was recorded between 5 and 50 m depth.

#### Taxonomic remarks

*Aspiculophora madinina* sp. nov. is a homoscleromorph sponge without skeleton and with a high content of collagen, providing a jelly-like consistency. As yet, massive forms such as this have not been reported in the aspiculate Oscarellidae. On the other hand, this species could be a *Plakortis* without spicules because most of its representatives occur as massive or globular forms. There is one report of such a *Plakortis* without spicules in the Caribbean Sponge Guide (Zea, Henkel & Pawlik, 2014), but the taxonomic affiliation to *Plakortis* was based only on the external morphology and the pungent smell of some specimens. It is difficult to compare the cytological characteristics of a putative new species with

other Plakinidae, because of the lack of data at this level of biological organization. Indeed, traditional taxonomy has placed most attention on the skeletal description of this family, even if skeletal differences are poorly detectable in many species. Some other characters such as a leuconoid aquiferous system, eurypylous choanocyte chambers, well-developed mesohyl and subectosomal cavities are not sufficiently diagnostic, as they can be present or absent among *Plakina*, *Plakortis* and *Plakinastrella* species. We thus believe that more thorough cytological investigations of *Plakortis*, *Plakinastrella* and *Corticium* might help in resolving a good number of taxonomic questions in this family.

The new genus is proposed because of the singularity of its CO1 sequences positioning the new species among the Plakinidae, near the base of this clade, but outside all previously known genera.

Moreover, we believe that its internal organization, with a thick collagen layer surrounding the inhalant canals and within the mesohyl, is unique among Homoscleromorpha.

#### DNA ANALYSIS OF STUDIED SPECIES

GenBank accession numbers for all sequences in this study are presented in Table 3. The two families of Homoscleromorpha are well supported in the phylogenetic reconstructions (Figs 7–9). With the Folmer partition (Fig. 7), *Corticium* appears as a monophyletic taxon of Plakinidae. *Plakortis* seems to be paraphyletic, a first clade being composed of *Plakortis angulospiculatus* (Carter, 1879) and the type species *P. simplex* Schulze, 1880, while a second clade clusters *P. albicans* Cruz-Barraza & Carballo, 2005 with two *Plakinastrella* species. In this

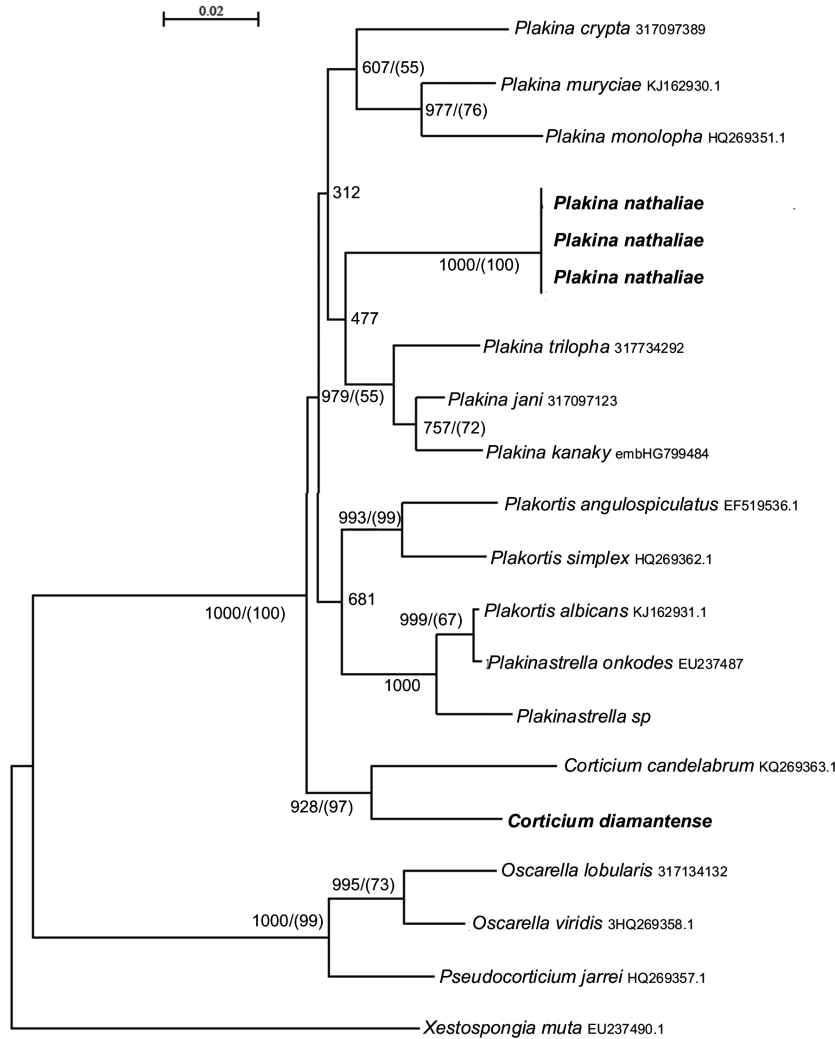

**Figure 7.** Phylogenetic reconstruction of the universal Folmer portion of the CO1 gene using neighbour-joining analysis and indicating maximum-likelihood (ML) values. Bootstrap values are given for both analyses; ML values are in parenthesis. The accession numbers of each download sequence are next to the species name.

representation lacking a sequence of the type species, *Plakina* appears as a poorly supported monophyletic group (Fig. 7), with two clades (bootstrap values of 312/47), one with *P. crypta* Muricy, Boury-Esnault, Bézac & Vacelet, 1998, *P. monolopha* and *P. muricyae* Cruz-Barraza, Vega & Carballo, 2014 closely related, and the other comprising three specimens of *P. nathaliae*, *P. trilopha*, *P. jani* and *P. kanaky*.

The second phylogenetic tree using the I3-M11 CO1 fragment (Fig. 8) supports three monophyletic genera among Plakinidae, *Aspiculophora*, *Plakinastrella* and *Plakortis*. In this analysis *Plakina* is paraphyletic, *P. monolopha* (type species) forming a highly supported clade with *C. candelabrum* Schmidt, 1862, a second group containing *P. arletensis*

sp. nov. and *P. jani*, and a third with *P. crypta* and *P. trilopha*.

The third phylogenetic tree was made by concatenating all available sequences (Fig. 9). Because of missing data for one of the two fragments, the alignment contains several gaps and the concatenated tree appears less robust than the two-first representations of the inter-specific relationships among Homoscleromorpha. However, the topology of this third tree is quite congruent with the previous ones. In this representation, *Aspiculophora* forms a separate clade within the Plakinidae. Also, *Plakina* seems paraphyletic with two different clades, the first one grouping *P. arletensis* sp. nov. with *P. kanaky*, *P. jani*, *P. trilopha* and *P. nathaliae*, whereas the second one, containing the type species

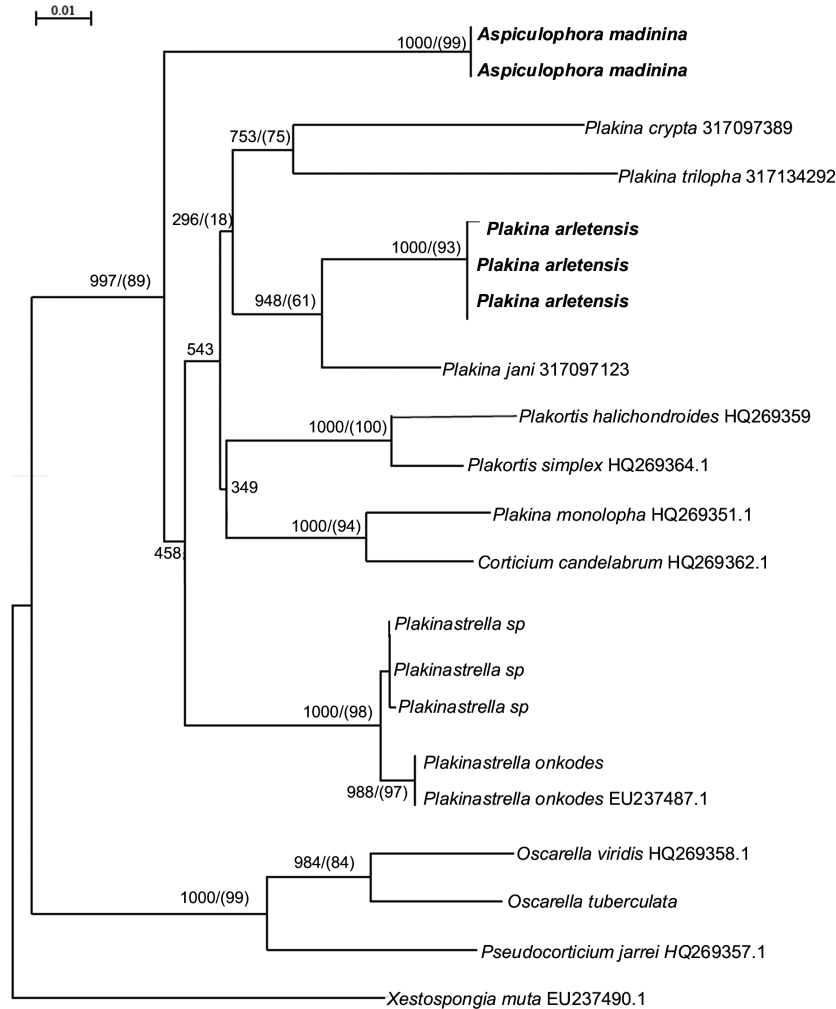

**Figure 8.** Phylogenetic reconstruction of the I3-M11 portion of the CO1 gene using neighbour-joining (NJ) analysis and indicating maximum-likelihood (ML) values. Bootstrap values are given for both analyses; ML values are in parenthesis. The accession numbers of each download sequence are next to the species name.

*P. monolopha*, *P. muryciae* and *P. crypta*, is related to *Corticium*, which seems monophyletic. *Plakortis* also appears paraphyletic, a first clade grouping the type species *P. simplex*, *P. halichondroides* and *P. angulospiculatus*, and a second clade containing *P. albicans*, *Plakinastrella onkodes* and an undetermined *Plakinastrella*. Finally, a separate clade containing five specimens of *Plakinastrella* also makes this genus paraphyletic in this phylogenetic representation.

## DISCUSSION

Eighty species of Plakinidae are recognized as valid in the World Porifera Database (Van Soest *et al.*, 2016), to which the present study adds another three. Plakinidae is found throughout the world's oceans except in polar regions, and appears to be

often found in shady rocky habitats. In the Caribbean Sea, several new species and a new genus have recently been described (Ereskovsky *et al.*, 2013; Rützler *et al.*, 2014), although it is likely that the diversity of this family remains underestimated, mainly because of the lack of exploration of cryptic habitats and submarine caves.

Twenty-seven species of *Plakina* are now described, mainly on the basis of the composition of their spicules. The presence of lophose calthrops is considered a diagnostic character that separates *Plakina* species from other Plakinidae. Different genetic markers have been used to shed light on Homoscleromorpha systematics, and the phylogenetic trees using 18S and 28S (Gazave *et al.*, 2010, 2013), cytochrome oxidase b and CO1 (Ereskovsky *et al.*, 2013; Cruz-Barraza *et al.*, 2014; Ruiz *et al.*, 2015) are largely congruent. In the present study, CO1 has

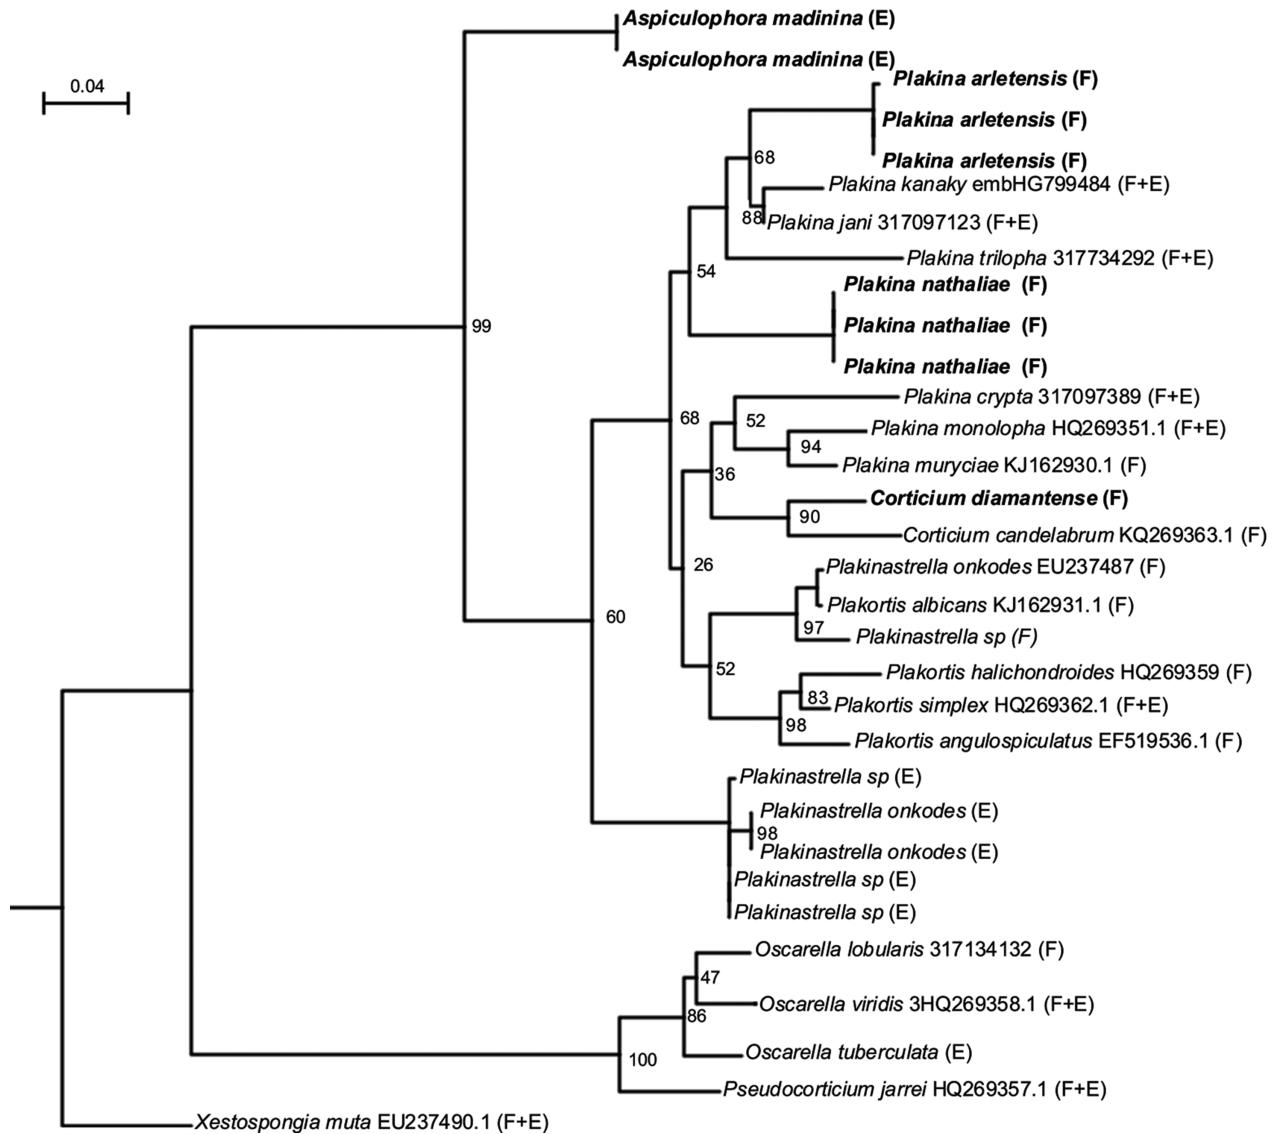

**Figure 9.** Phylogenetic reconstruction concatenating the Folmer and I3-M11 fragments of the CO1 using maximum-likelihood analysis. All sequences from this study were aligned with both fragments (F+E), Folmer (F) and I3-M11 (E). The accession number of each downloaded sequence is next to the species name.

been used in an integrative systematics approach, combining the analyses of morphological and cytological characters, to place our specimens among the different genera and families of Homoscleromorpha. Our phylogenetic analysis supports the allocation of *Aspiculo-phora madinina* gen. nov., sp. nov. to Plakinidae, and clearly differentiates this new representative of the family from all other taxa. Taking into account these results and an original internal body-plan, we propose the creation of the first genus of aspiculate Homoscleromorpha outside of Oscarellidae.

Previous classifications of Homoscleromorpha recognized the strength and weakness of the present

genus composition in both families, but until now no one has clearly established the phylogenetic interspecific relationships among the different genera. *Plakina arletensis* sp. nov. and *P. jani* form a well-supported clade (bootstrap values 96/76), which is in accordance with their morphological traits. We conclude that *P. arletensis* is a new species and must be included in clade B3 proposed by Gazave *et al.* (2010) grouping *P. trilopha*, *P. jani* and *P. kanaky*. We add new data showing the non-monophyly of *Plakina*, but before proposing any changes to the status of this genus, we consider it necessary to obtain more DNA sequences and a revision of the morphological descriptions of the

type species *Plakina monolopha* and *Corticium candelabrum*. Indeed, the I3-M11 sequences of these two species form a single, well-supported clade. We are convinced that the addition of other datasets such as metabolomic fingerprints or meta-barcoding of the symbiotic prokaryote communities will help to better understand the evolutionary mechanisms at play in the origin of this group of sponges.

We decided to rename *Oscarella nathaliae* as analyses of the CO1 sequences derived from the first specimen collected in La Martinique in 2011 showed it was clearly affiliated with Plakinidae. Due to technical difficulties, this specimen remained the only one that could be sequenced. In the meantime, Ereskovsky *et al.* (2013) described this new species without any molecular data. Our genetic analysis of the CO1 of numerous new records of this species, from the south-western Caribbean (Colombia) to the northernmost part of the eastern Caribbean, showed clear affiliations with Plakinidae. Considering its position among most representatives of the *Plakina* (Fig. 7), even given the sometimes low bootstrap support and the recognized non-monophyletic status of the genus, we considered the renaming of this species as *Plakina nathaliae* as the most parsimonious option. This sponge was originally described as having a unique external morphology within *Oscarella*: ‘a thin and leaf-like sponge, with a surface perforated by abundant pores’ (Ereskovsky *et al.*, 2013: 289). Another characteristic noted by authors was the ‘irregular and punctual attachment to the substratum’ (Ereskovsky *et al.*, 2013: 302). These morphological traits are actually shared with *Plakina crypta*, a sciaphilous, exclusively Mediterranean species. *Plakina nathaliae* also has an internal organization that is similar to *Plakina crypta* and *P. endoumensis*. These three species share the absence of subectosomal cavities, a similar proportion mesohyl/choanocyte chambers, their leuconoid aquiferous system and their eurypylous choanocyte chambers. Finally, all three *Plakina* species can be considered as LMA sponges (Table 2), another anatomical trait which separates them from several other *Plakina* species such as *P. jani* or *P. kanaky* (Muricy *et al.*, 1999; Ruiz *et al.*, 2015). Meanwhile the report of two species without skeleton within Plakinidae again demonstrates that spicules can be secondarily lost in sponges and the heavy reliance on a classification based on spicule composition can often lead to homoplasious results. Recent sampling cruises that focused on submarine caves from the Pacific Ocean and the Caribbean Sea identified numerous new representatives of Homoscleromorpha which have as yet not been described. It is likely that the inclusion of new taxa in combination with additional complementary molecular and cytological

investigations will permit a thorough revision of *Plakina*. For now, on the basis of these new descriptions and revision, we propose to update the taxonomic keys for Homoscleromorpha taking into account that Plakinidae contains ‘Homosclerophorida with inorganic (spicular) skeletal complements’, which can be lost in some cases. The absence of spicules is no longer exclusive to Oscarellidae.

## ACKNOWLEDGEMENTS

This work was performed in the framework of the French–Brazilian Associated International Laboratory ‘LIA MARRIO’ funded by the CNRS. T.P. and C.R. acknowledge the Total Foundation, and G.M., A.L. and C.D. acknowledge the Fundação Carlos Chagas de Apoio à Pesquisa do Rio de Janeiro (FAPERJ), Coordenação de Aperfeiçoamento de Pessoal de Nível Superior (CAPES) and Conselho Nacional de Desenvolvimento Científico e Tecnológico (CNPq) for grants and fellowships. We are grateful to Joël Courageot and Alexandre Altié of the Electronic Microscope service in Aix-Marseille University, and to all the crew of the N/O *Antea* for their involvement in the PACOTILLES campaign in the Lesser Antilles, to Sven Zea in Colombia, to Julien Chalifour in Saint Martin and to our great friend ‘Filipo’ in La Martinique who took us to various diving sites and helped in the collection and preservation of most of the samples. We are also grateful to Nicole Boury-Esnault and Jean Vacelet for the great source of inspiration they represent, and for their always positive criticisms on our work. The English text was kindly thoroughly revised by Christine Morrow.

## REFERENCES

- Bergquist PR. 1978.** *Sponges*. London: Hutchinson.
- Boury-Esnault N, De Vos L, Vacelet J. 1984.** Comparative study of the choanosome of Porifera. 1: the Homoscleromorpha. *Journal of Morphology* **180**: 3–17.
- Boury-Esnault N, Solé-Cava AM, Thorpe JP. 1992.** Genetic and cytological divergence between colour morphs of the Mediterranean sponge *Oscarella lobularis* Schmidt (Porifera, Demospongiae, Oscarellidae). *Journal of Natural History* **26**: 271–284.
- Boury-Esnault N, Muricy G, Gallissian MF, Vacelet J. 1995.** Sponges without skeleton: a new Mediterranean genus of Homoscleromorpha (Porifera, Demospongiae). *Ophelia* **1**: 25–43.
- Boury-Esnault N, Lavrov D, Ruiz C, Pérez T. 2013.** The integrative taxonomic approach applied to Porifera: a case study of the Homoscleromorpha. *Integrative and Comparative Biology* **53**: 416–427.
- Cárdenas P, Pérez T, Boury-Esnault N. 2012.** Sponge systematics facing new challenges. *Advances in Marine Biology* **61**: 79–209.



- Carter HJ. 1879.** Contributions to our Knowledge of the Spongida. *Annals and Magazine of Natural History* **3**: 284–304.
- Cedro V, Hajdu E, Correia M. 2013.** Three new intertidal sponges (Porifera: Demospongiae) from Brazil's fringing urban reefs (Maceió, Alagoas, Brazil), and support for *Rhabderrhemia*'s exclusion from Poecilosclerida. *Journal of Natural History* **47**: 2151–2174.
- Cruz-Barraza JA, Carballo JL. 2005.** First record of *Plakortis* Schulze (Porifera: Homosclerophorida) from the Northeast Pacific coast, with the description of *Plakortis albicans* sp. nov. *Zootaxa* **868**: 1–12.
- Cruz-Barraza JA, Vega C, Carballo JL. 2014.** Taxonomy of family Plakinidae (Porifera: Homoscleromorpha) from eastern Pacific coral reefs, through morphology and *cox1* and *cobmtDNA* data. *Zoological Journal of the Linnean Society* **171**: 254–276.
- Darriba D, Taboada G, Doallo R, Posada D. 2012.** jModelTest 2: more models, new heuristic and parallel computing. *Nature Methods* **9**: 772.
- Dendy A. 1905.** Report on the sponges collected by Professor Herdman at Ceylon in 1902. In: Herdman W, ed. *Report to the Government of Ceylon on the Pearl Oyster fisheries of the gulf of Manaar*. London, UK: Royal Society of London, 57–246.
- Ereskovsky AV, Ivanišević J, Pérez T. 2009.** Overview on the Homoscleromorpha sponges diversity in the Mediterranean. *Proceedings of the 1st symposium on the Coralligenous and other calcareous bio-concretions for the Mediterranean Sea*: 89–95.
- Ereskovsky AV, Lavrov D, Willenz P. 2013.** Five new species of Homoscleromorpha (Porifera) from the Caribbean Sea and re-description of *Plakina jamaicensis*. *Journal of the Marine Biological Association of the United Kingdom* **94**: 285–307.
- Erpenbeck D, Breeuwer JA, van der Velde H, van Soest RWM. 2002.** Unraveling host and symbiont phylogenies of halichondrid sponges (Demospongiae, Porifera) using a mitochondrial marker. *Marine Biology* **141**: 377–386.
- Fichez R. 1990.** Decrease in allochthonous organic inputs in dark submarine caves, connection with lowering in benthic community richness. *Hydrobiologia* **207**: 61–69.
- Folmer O, Black M, Hoeh W, Lutz R, Vrijenhoek R. 1994.** DNA primers for amplification of mitochondrial cytochrome c oxidase subunit I from diverse metazoan invertebrates. *Molecular Marine Biology and Biotechnology* **3**: 294–299.
- Gazave E, Lapébie P, Renard E, Vacelet J, Rocher C, Ereskovsky AV, Lavrov DV, Borchiellini C. 2010.** Molecular phylogeny restores the supra-generic subdivision of homoscleromorph sponges (Porifera, Homoscleromorpha). *PLoS ONE* **5**: e14290.
- Gazave E, Lapébie P, Ereskovsky AV, Vacelet J, Renard E, Cárdenas P, Borchiellini C. 2012.** No longer Demospongiae: Homoscleromorpha formal nomination as a fourth class of Porifera. *Hydrobiologia* **687**: 3–10.
- Gazave E, Lavrov D, Cabrol J, Renard E, Rocher C, Vacelet J, Adamska M, Borchiellini C, Ereskovsky AV. 2013.** Systematics and molecular phylogeny of the family Oscarellidae (Homoscleromorpha) with description of two new *Oscarella* species. *PLoS ONE* **8**: e63976.
- Gerovasileiou V, Voultsiadou E. 2012.** Marine caves of the Mediterranean Sea: a sponge biodiversity reservoir within a biodiversity hotspot. *PLoS ONE* **7**: e39873.
- Gerovasileiou V, Chintiroglou C, Vafidis D, Koutsoubas D, Sini M, Dailianis T, Issaris Y, Akritopoulou E, Dimarchopoulou D, Voultsiadou E. 2015.** Census of biodiversity in marine caves of eastern Mediterranean Sea. *Mediterranean Marine Science* **16**: 245–265.
- Grant RE. 1836.** Animal Kingdom. In: Todd RB, ed. *The cyclopedia of anatomy and physiology*, vol. 1. London: Sherwood, Gilbert and Piper, 1–813.
- Guindon S, Lefort V, Anisimova M, Hordijk W, Gascuel O. 2010.** New algorithms and methods to estimate Maximum-Likelihood phylogenies: assessing the performance of PhyML 3.0. *Systematic Biology* **59**: 307–321.
- Hall T. 1999.** BioEdit: a user-friendly biological sequence alignment editor and analysis program for Windows 95/98/NT. *Nucleic Acid Symposium Series* **41**: 95–98.
- Harmelin JG. 2003.** Biodiversité des habitats cryptiques marins du parc national de Port-Cros (Méditerranée, France). Assemblages de bryozoaires d'une grotte sous-marine et des faces inférieures de pierres. *Scientific Reports Port-Cros National Park* **19**: 101–115.
- Harmelin JG, Vacelet J, Vasseur P. 1985.** Les grottes sous-marines obscures: un milieu extrême et un remarquable biotope refuge. *Téthys* **11**: 214–229.
- Hart CW, Manning RB, Iliffe TM. 1985.** The fauna of Atlantic marine caves: evidence of dispersal by sea floor spreading while maintaining ties to deep waters. *Proceedings of the Biological Society of Washington* **98**: 288–292.
- Ivanišević J, Thomas O, Lejeune C, Chevaldonné P, Pérez T. 2011.** Metabolic fingerprinting as an indicator of biodiversity: towards understanding inter-specific relationships among Homoscleromorpha sponges. *Metabolomics* **7**: 289–304.
- Larkin M, Blackshields G, Brown N, Chenna R, McGettigan P, McWilliam H, Valentin F, Wallace I, Wilm A, Lopez R, Thompson J, Gibson T, Higgins D. 2007.** Clustal W and Clustal X version 2.0. *Bioinformatics* **23**: 2947–2948.
- Lendenfeld R. 1887.** On the systematic position and classification of sponges. *Proceedings of the Zoological Society of London* **1886**: 558–662.
- Misof B, Erpenbeck D, Sauer K. 2000.** Mitochondrial gene fragments suggest paraphyly of the genus *Panorpa* (Mecoptera, Panorpidae). *Molecular Phylogenetics and Evolution* **17**: 76–84.
- Muricy G. 1999.** An evaluation of morphological and cytological data sets for the phylogeny of Homosclerophorida (Porifera: Demospongiae). *Memoirs of the Queensland Museum* **44**: 399–409.
- Muricy G, Díaz MC. 2002.** Order Homosclerophorida Dendy, 1905, Family Plakinidae, Schulze, 1880. In: Hooper JNA, van Soest RWM, eds. *Systema Porifera: a guide to the*

- classification of sponges. New York: Kluwer Academic/Plenum Publishers, 71–82.
- Muricy G, Boury-Esnault N, Bézac C, Vacelet J. 1996.** Cytological evidence for cryptic speciation in Mediterranean *Oscarella* species (Porifera, Homoscleromorpha). *Canadian Journal of Zoology* **74**: 881–896.
- Muricy G, Boury-Esnault N, Bézac C, Vacelet J. 1998.** Taxonomic revision of the Mediterranean *Plakina* Schulze (Porifera, Demospongiae, Homoscleromorpha). *Zoological Journal of the Linnean Society* **124**: 169–203.
- Muricy G, Bézac C, Gallissian MF, Boury-Esnault N. 1999.** Anatomy, cytology and symbiotic bacteria of four Mediterranean species of *Plakina* Schulze, 1880 (Demospongiae, Homosclerophorida). *Journal of Natural History* **33**: 159–176.
- Pérez T, Bitar G, Vacelet J, Zibrowius H. 2004.** Two new lithistids (Porifera: Demospongiae) from a shallow eastern Mediterranean cave (Lebanon). *Journal of Marine Biology Association of the United Kingdom* **84**: 15–24.
- Pérez T, Ivanišević J, Dubois M, Pedel L, Thomas O, Tokina D, Ereskovsky A. 2011.** *Oscarella balibaloï*, a new sponge species (Homoscleromorpha: Plakinidae) from the Western Mediterranean Sea: cytological description, reproductive cycle and ecology. *Marine Ecology* **32**: 174–187.
- Pouliquen L. 1972.** Les spongiaires des grottes sous-marines de la région de Marseille: écologie et systématique. *Tethys* **3**: 717–758.
- Ruiz C, Ivanišević J, Chevaldonné P, Ereskovsky AV, Boury-Esnault N, Vacelet J, Thomas O, Pérez T. 2015.** Integrative taxonomic description of *Plakina kanaky*, a new polychromatic sponge species from New Caledonia (Porifera: Homoscleromorpha). *Marine Ecology* **36**: 1129–1143.
- Rützler K, Piantoni C, van Soest RWM, Díaz MC. 2014.** Diversity of the sponges (Porifera) from cryptic habitats on the Belize barrier reef near Carrie Bow Cay. *Zootaxa* **3805**: 1–129.
- Schmidt O. 1862.** *Die Spongien des adriatischen meeres*. Leipzig: Wilhelm Engelmann, 88 p., 7 pl.
- Schmidt O. 1870.** *Grundzüge einer Spongien-Fauna des Atlantischen gebietes*. Leipzig: Wilhelm Engelmann, 44–45.
- Schulze FE. 1880.** Untersuchungen über den Bau und die Entwicklung der Spongien. Neuten Mittheilung. Die Plakiniden. *Zeitschrift für wissenschaftliche Zoologie* **34**: 407–451.
- Solé-Cava AM, Boury-Esnault N, Vacelet J, Thorpe JP. 1992.** Biochemical genetic divergence and systematics in sponges of the genera *Corticium* and *Oscarella* (Demospongiae: Homoscleromorpha) in the Mediterranean Sea. *Marine Biology* **113**: 299–304.
- Stamatakis A. 2014.** RAxML version 8: a tool for phylogenetic analysis and post-analysis of large phylogenies. *Bioinformatics* **30**: 1312–1313.
- Topsent E. 1897.** Spongiaires de la Baie d'Amboine. Voyage de MM. M. Bedot et Pictet dans l'Archipel Malais. *Revue Suisse de Zoologie* **4**: 421–487.
- Vacelet J. 1999.** Sponges (Porifera) in submarine caves. *Qatar University Science Journal* **19**: 46–56.
- Vacelet J, Boury-Esnault N, Harmelin JG. 1994.** Hexactinellid Cave, a unique deep-sea habitat in the scuba zone. *Deep-sea Research* **51**: 965–973.
- Van Soest RWM, Boury-Esnault N, Hooper JNA, Rützler K, de Voogd NJ, de Alvarez Glasby B, Hajdu E, Pisera AB, Manconi R, Schoenberg C, Janussen D, Tabachnick KR, Klautau M, Picton B, Kelly M, Vacelet J, Dohrmann M, Díaz MC, Cárdenas P. 2016.** World Porifera database. Available at: <http://www.marine-species.org/porifera> on 20/01/2016.
- Vosmaer GCJ. 1884.** Porifera. In: Bronn HG, ed. *Die Klassen und Ordnungen des Thierreichs*, Vol. 2. Leipzig: C.F. Winter, 65–176.
- Zea S, Henkel T, Pawlik J. 2014.** *The sponge guide: a picture guide to Caribbean sponges*, 3rd edn. Available at: <http://www.spongeguide.org/> (accessed 10 December 2015).
